# Supplementary material for: Organ geometry channels cell fate in the Arabidopsis ovule primordium
Source: bioRxiv or medRxiv preprint supplement (doi:10.1101/2020.07.30.226670), 2020-12-22

## Supplemental Dataset 1- Gallery of wild-type (Col\_0) ovules used for the 3D digital atlas related to Figure 1

Number of ovules segmented for the analysis: 92 *from 84 images*

Stage 0-I n=21

Stage 0-II n=17

Stage 0-III n=11

Stage 1-I n=15

Stage 1-II n=11

Stage 2-I n=10

Stage 2-II n=7

# Stage 0-I (1/2)

EM\_C\_25

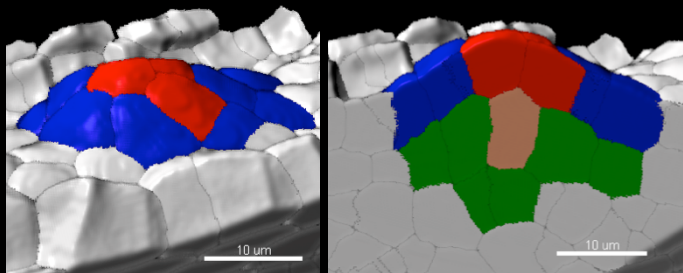

EM\_C\_149

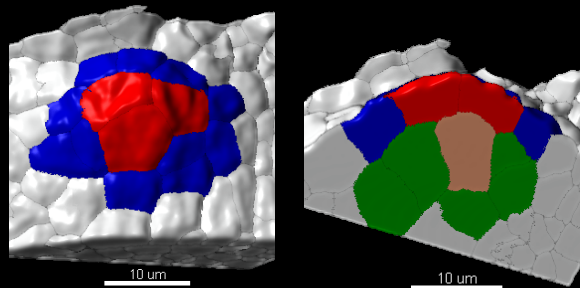

EM\_C\_58

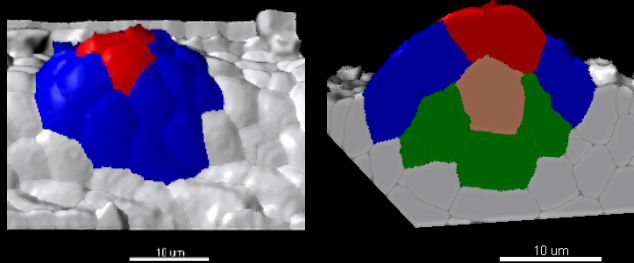

EM\_C\_237

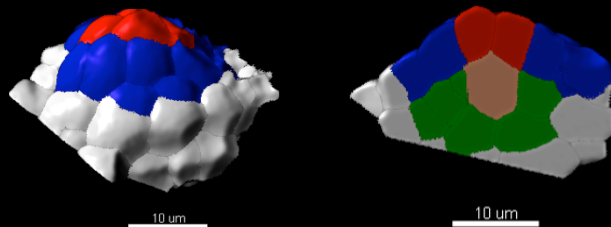

EM\_C\_59

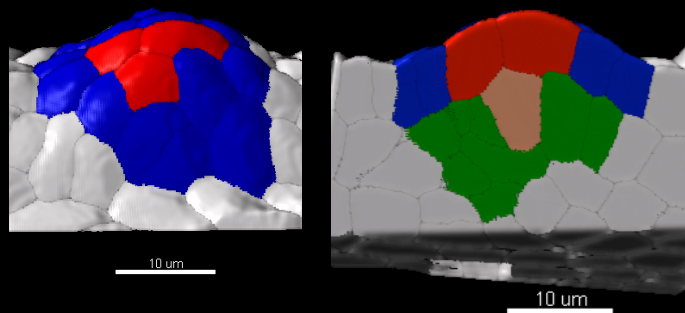

EM\_C\_240

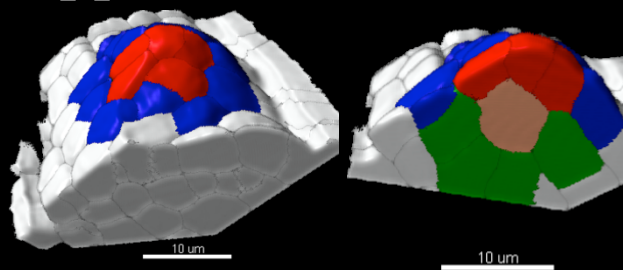

EM\_C\_60

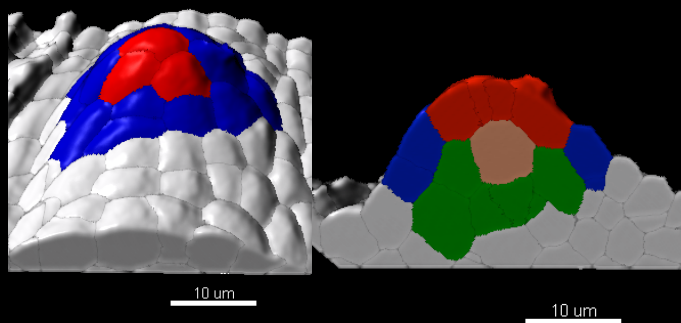

EM\_C\_241

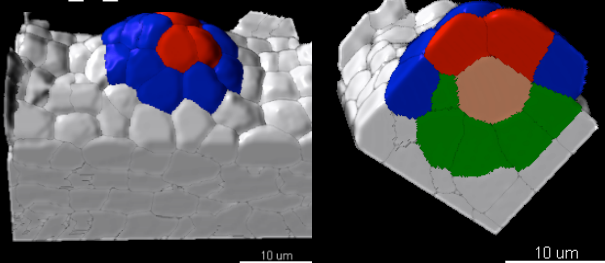

EM\_C\_76

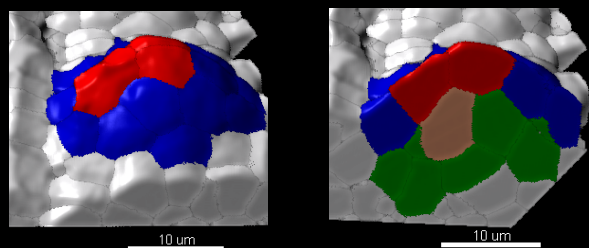

EM\_C\_242A

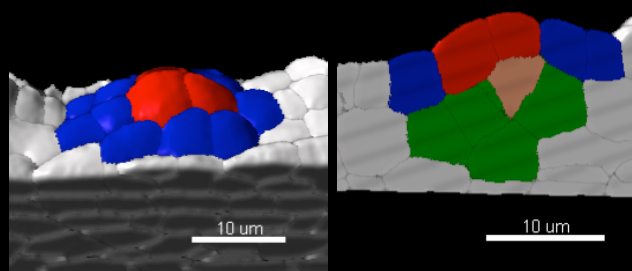

# Stage 0-I (2/2)

EM\_C\_243A

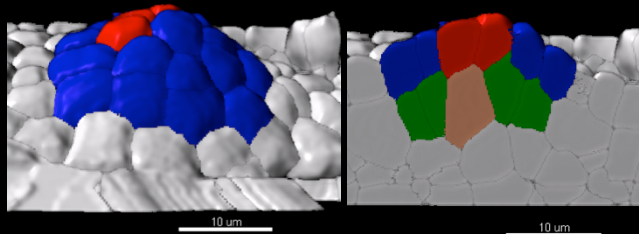

EM\_C\_245

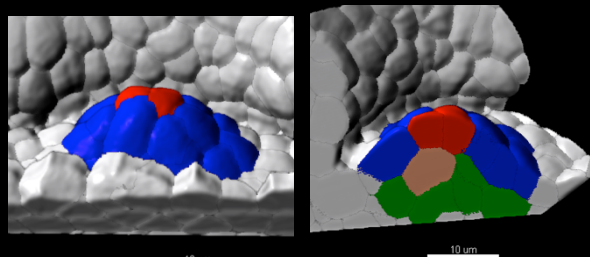

EM\_C\_243B

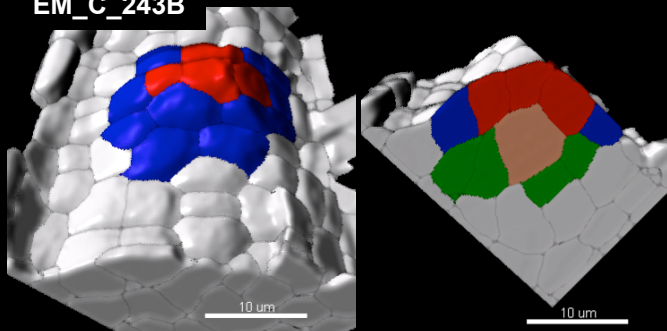

EM\_C\_377

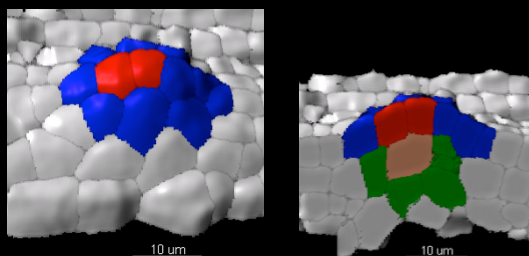

EM\_C\_244A

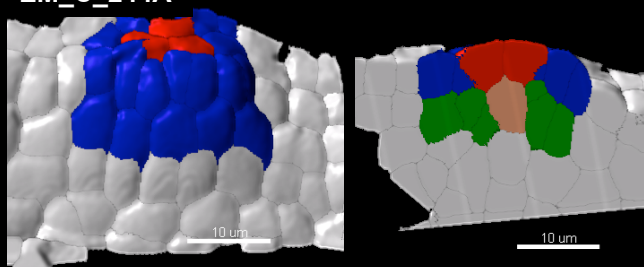

EM\_C\_378

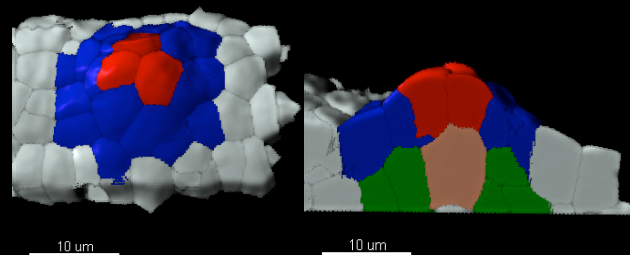

EM\_C\_354\_A

EM\_C\_354\_B

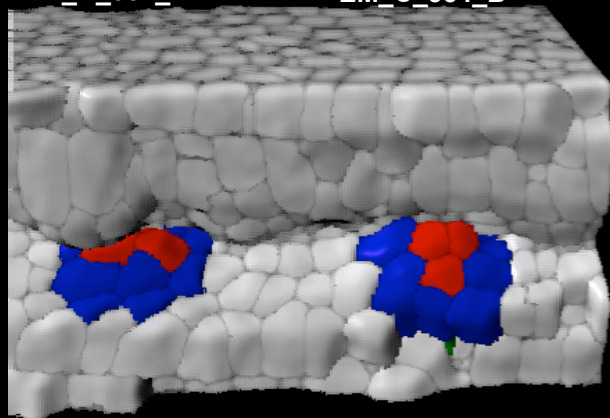

EM\_C\_595

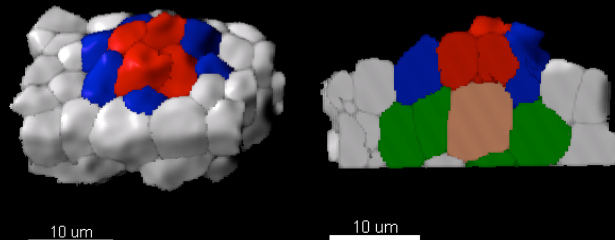

EM\_C\_596

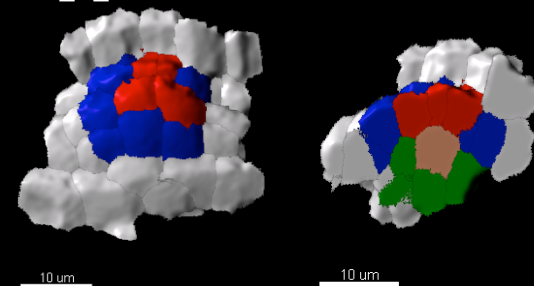

EM\_C\_597

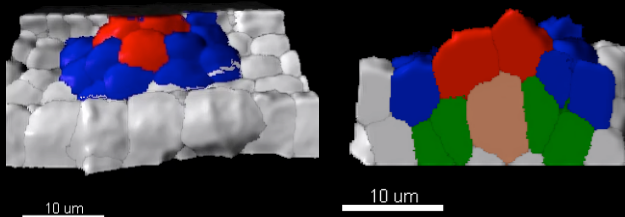

Stage 0-II (1/2)

EM\_C\_22

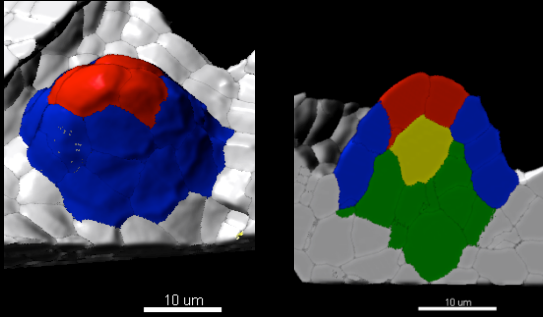

EM\_C\_77

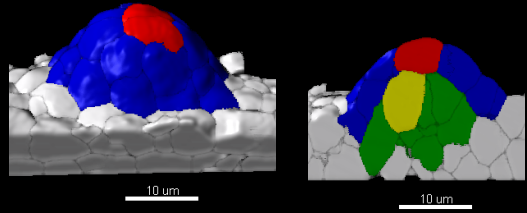

EM\_C\_78

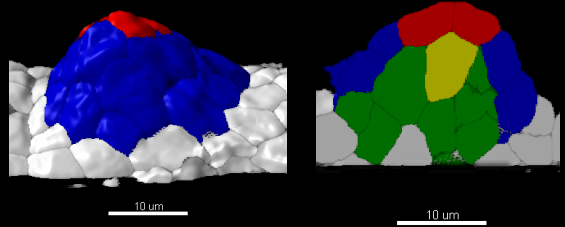

EM\_C\_57

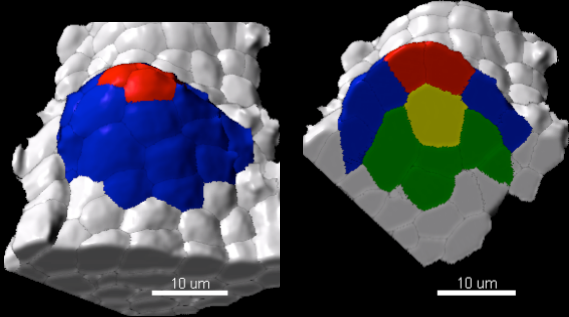

EM\_C\_146

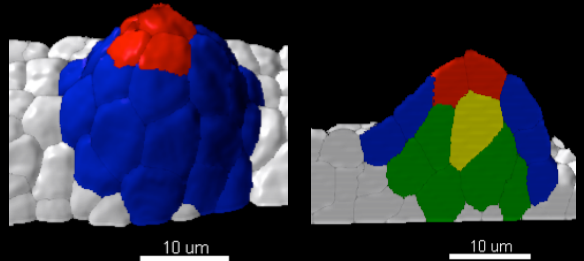

EM\_C\_61

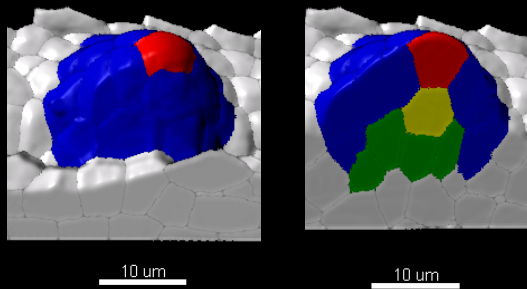

EM\_C\_148

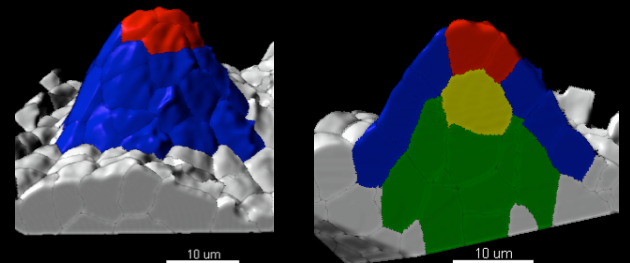

EM\_C\_75

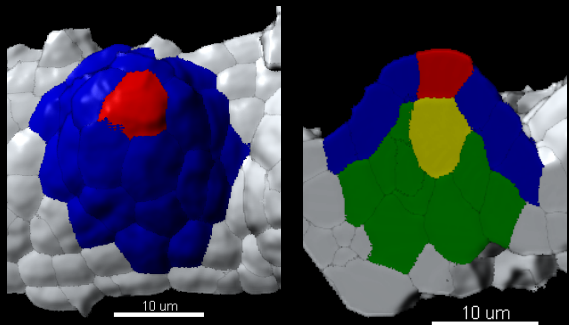

EM\_C\_150

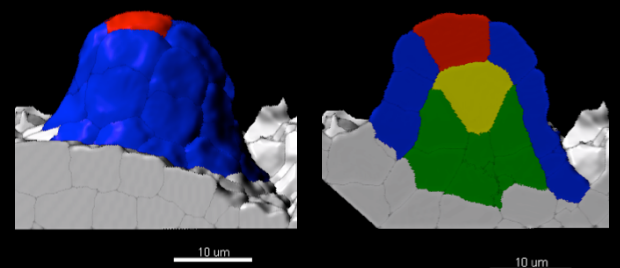

Stage 0-II (2/2)

EM\_C\_211

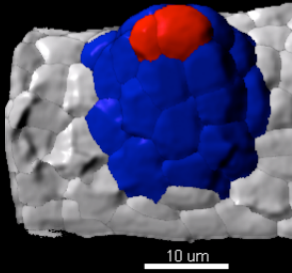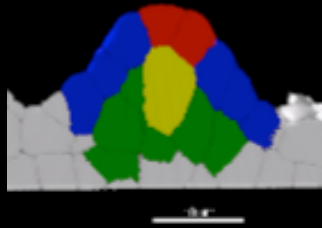

EM\_C\_214

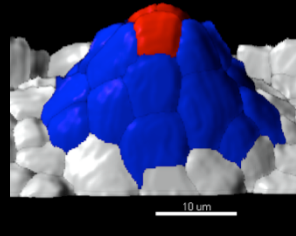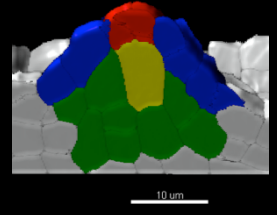

EM\_C\_212A

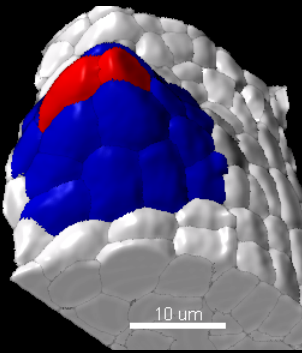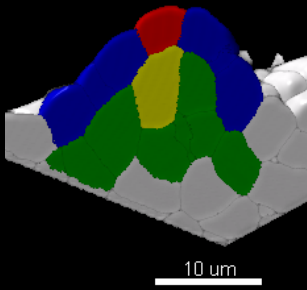

EM\_C\_238

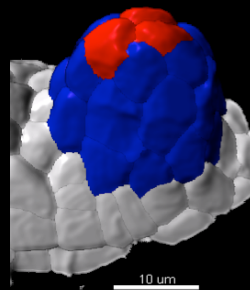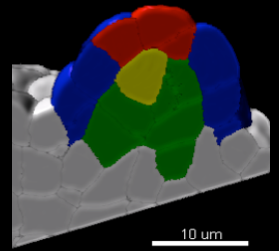

EM\_C\_212B

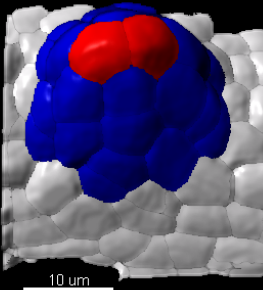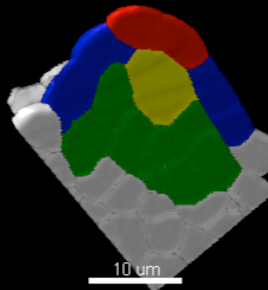

EM\_C\_239

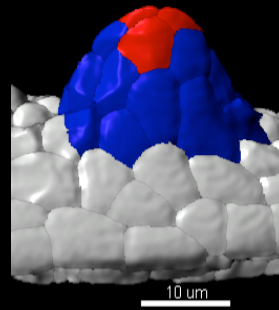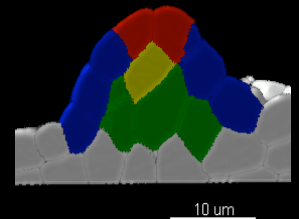

EM\_C\_213

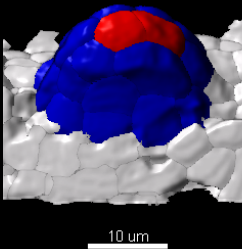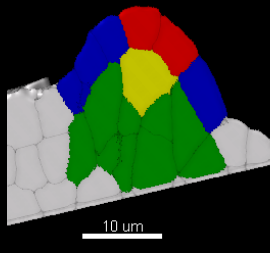

EM\_C\_246

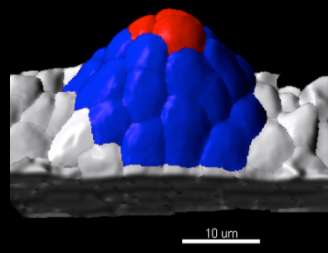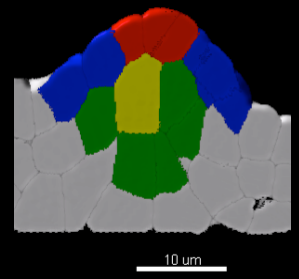

# Stage 0-III

EM\_C\_136

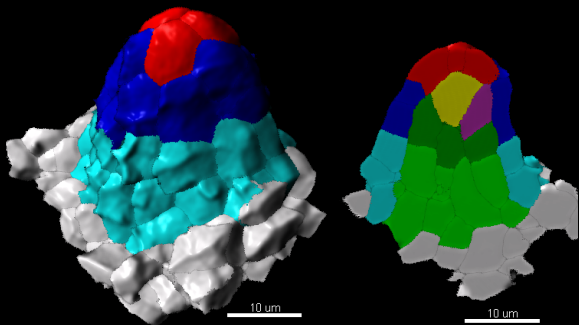

EM\_C\_141

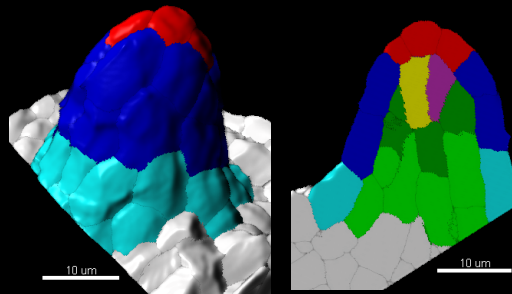

EM\_C\_138

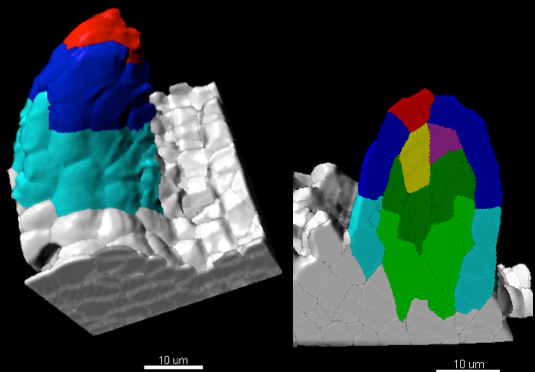

EM\_C\_142

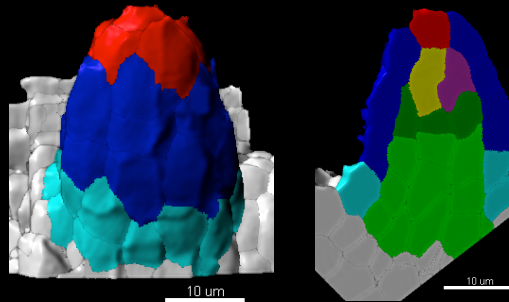

EM\_C\_139

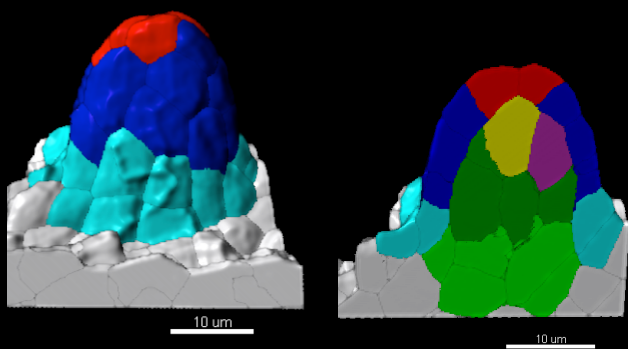

EM\_C\_187

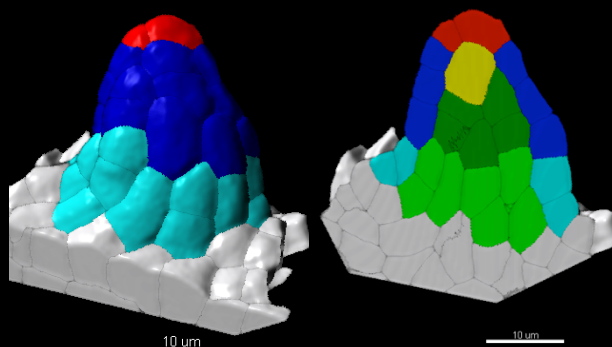

EM\_C\_140

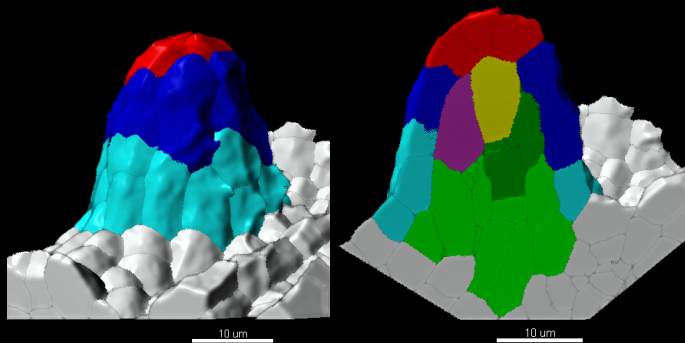

EM\_C\_403

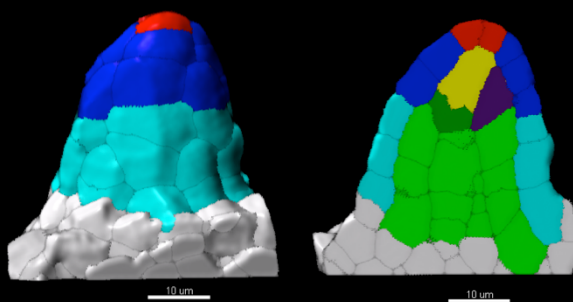

# Stage 1-I (1/2)

EM\_C\_6

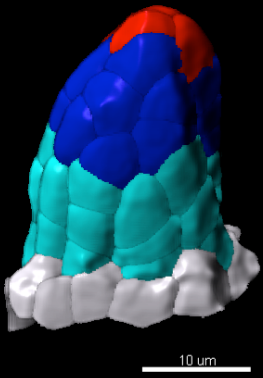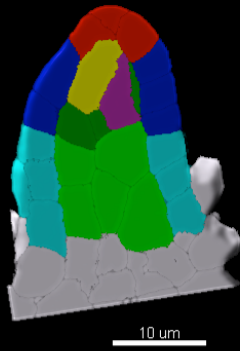

EM\_C\_189

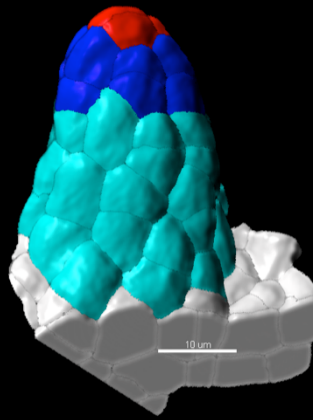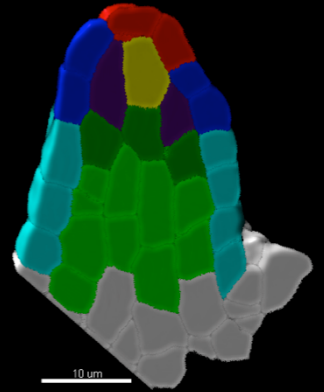

EM\_C\_185

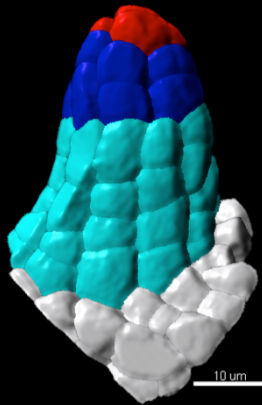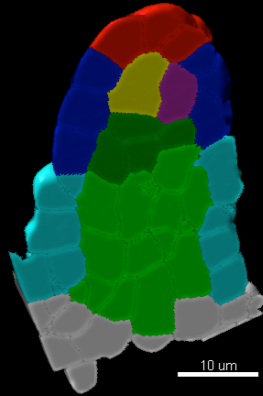

EM\_C\_196

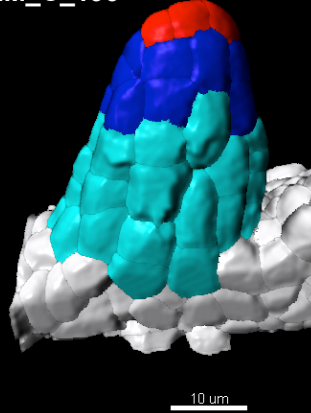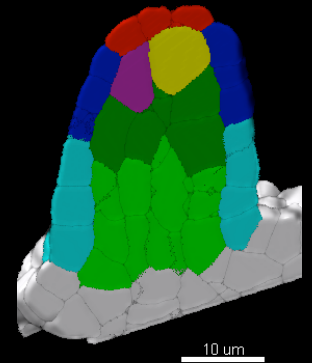

EM\_C\_186

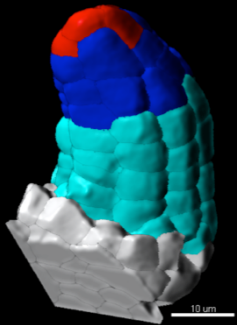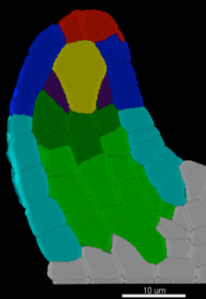

EM\_C\_198

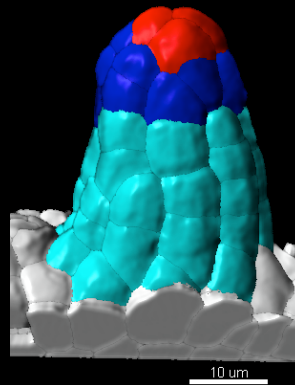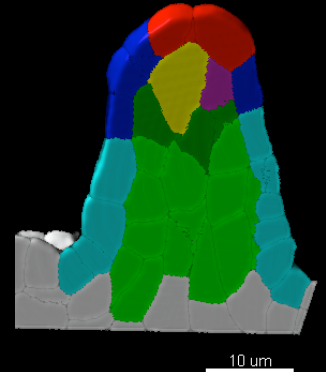

EM\_C\_188

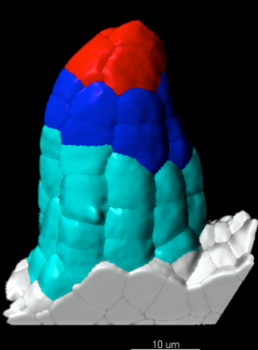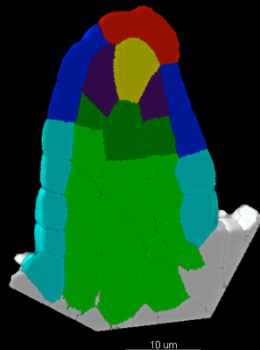

EM\_C\_200

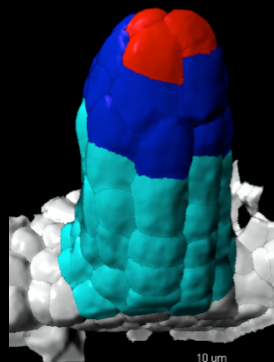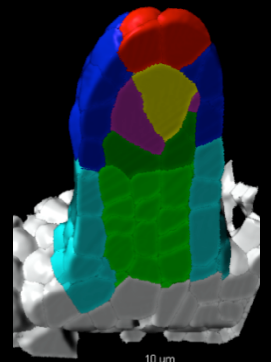

EM\_C\_202

Stage 1-l (2/2)

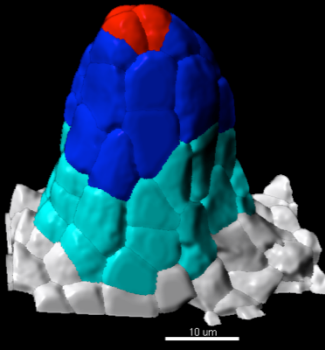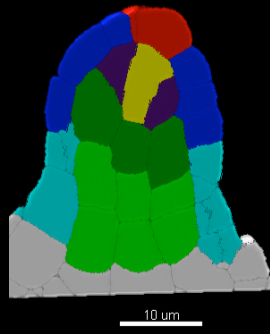

EM\_C\_359D

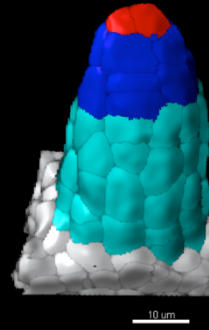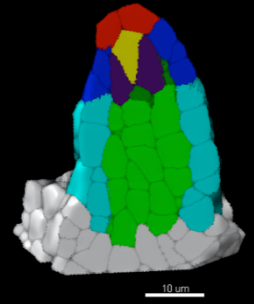

EM\_C\_357A

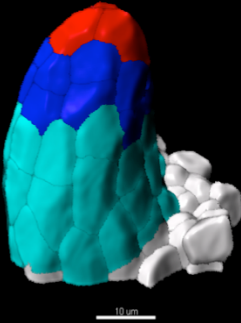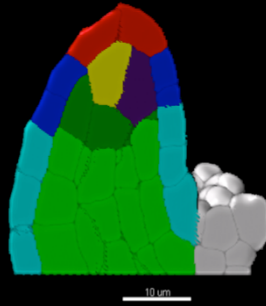

EM\_C\_399

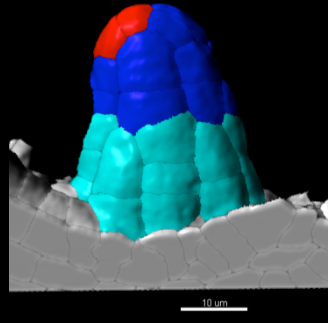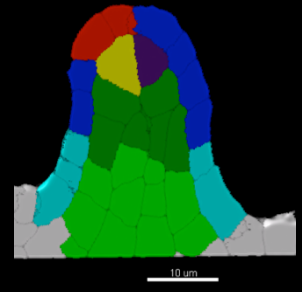

EM\_C\_359A

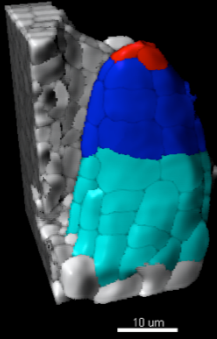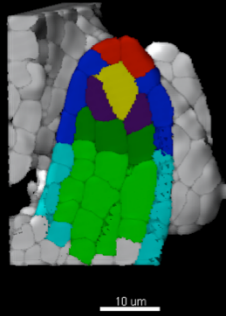

EM\_C\_400

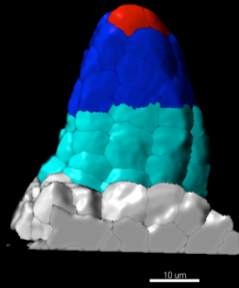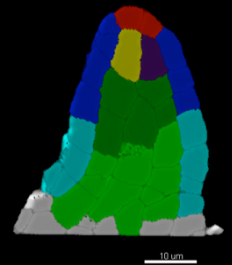

EM C 357B

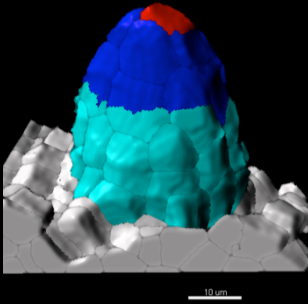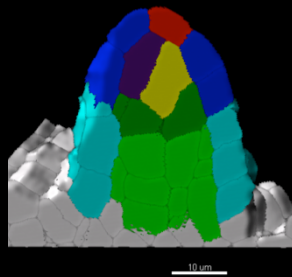

EM\_C\_404

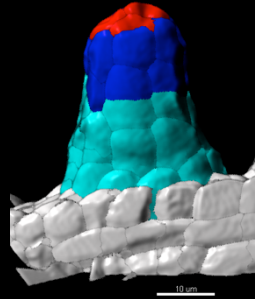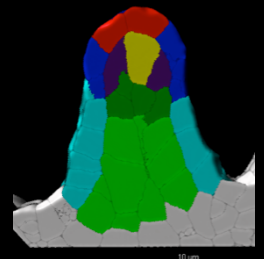

EM\_C\_406

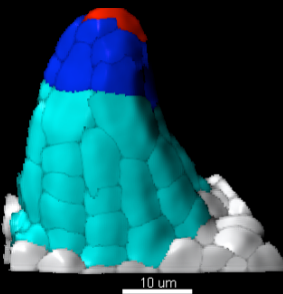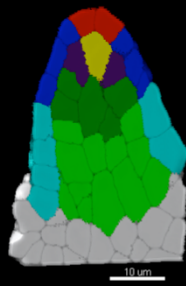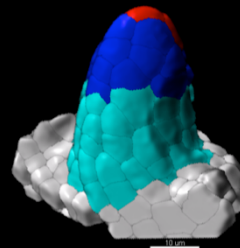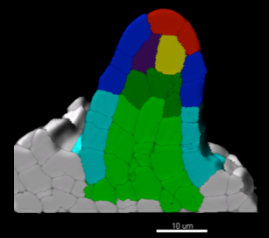



# Stage 1-II (1/2)

EM\_C\_96

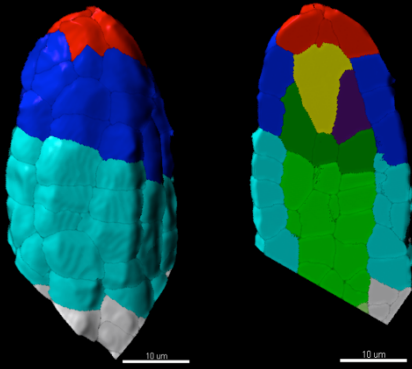

EM\_C\_184

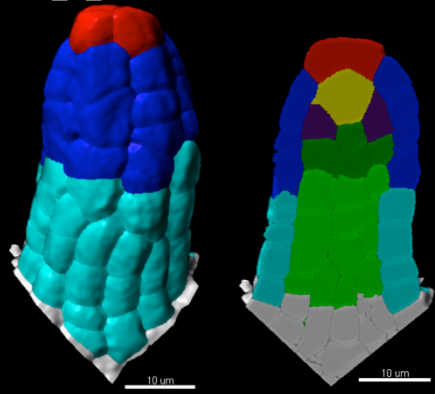

EM\_C\_102A

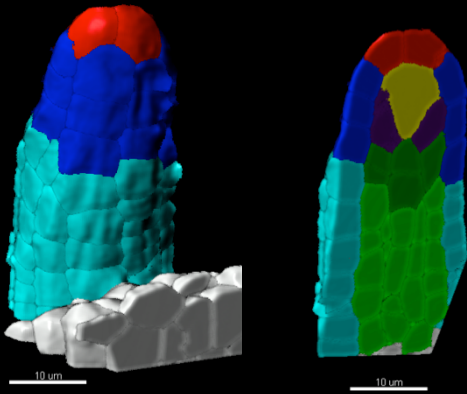

EM\_C\_199

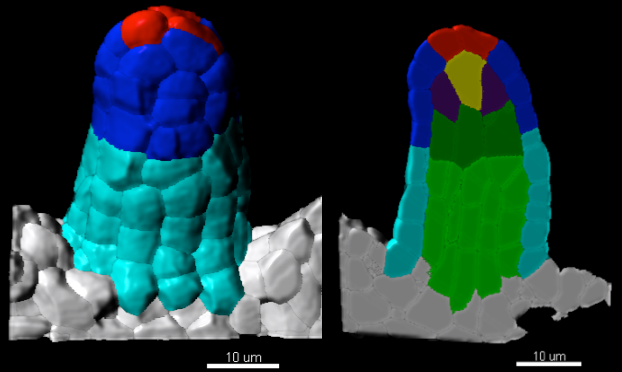

EM\_C\_112

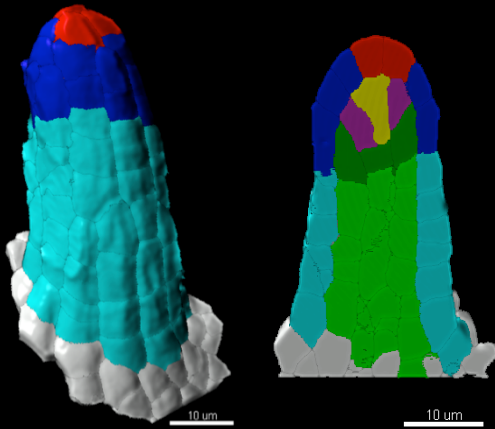

EM\_C\_201

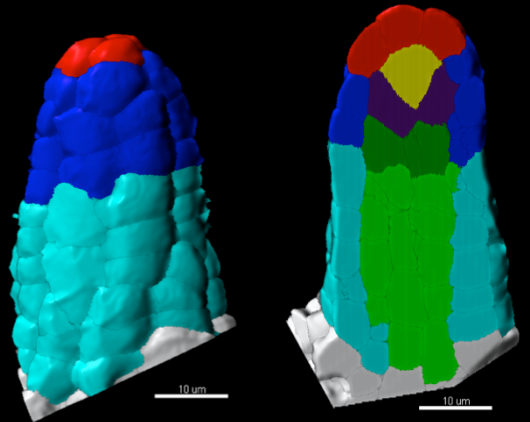

EM\_C\_162

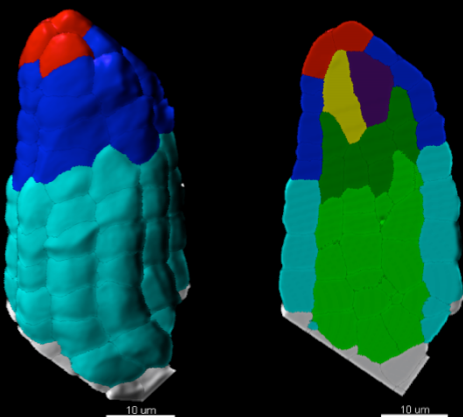

EM\_C\_204

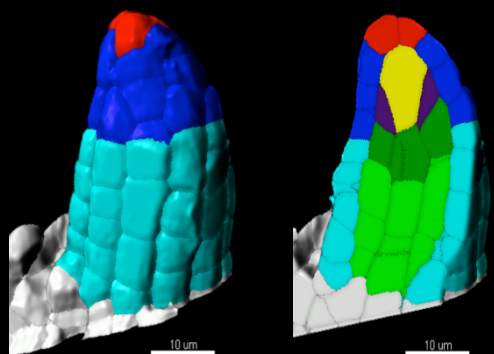

**Stage 1-II (2/2)**

**EM\_C\_359B**

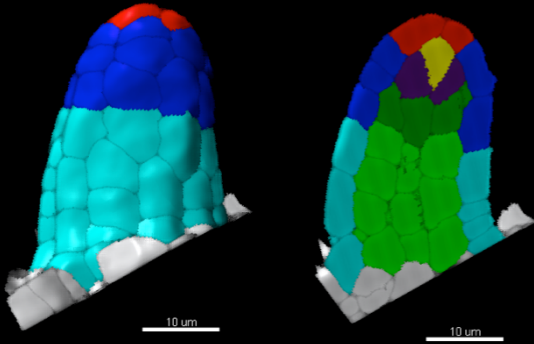

**EM\_C\_607**

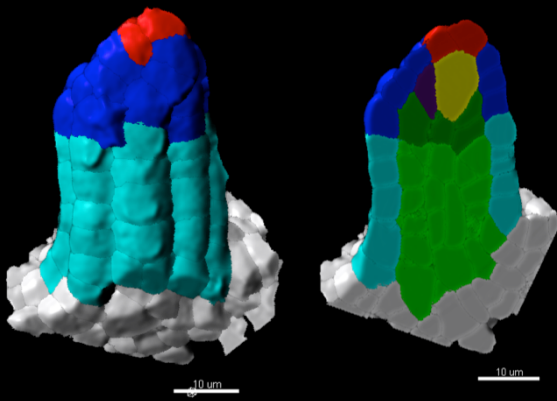

**EM\_C\_160**

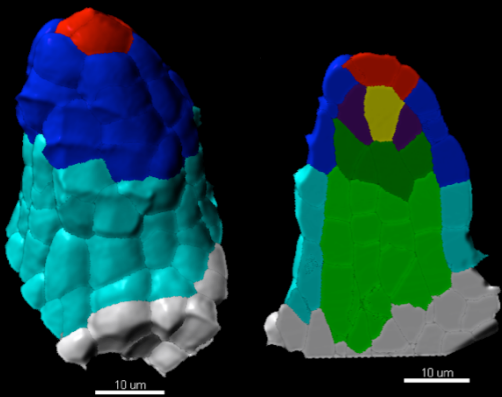

# Stage 2-l

EM\_C\_130

EM\_C\_101

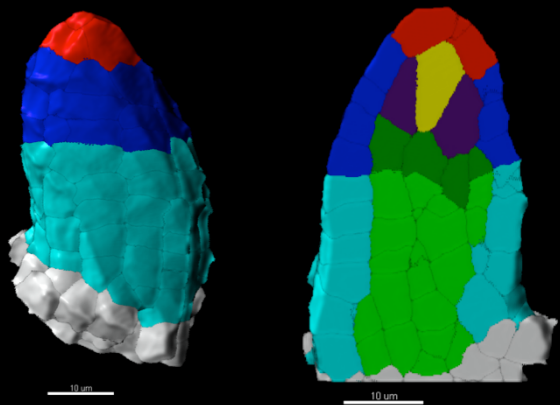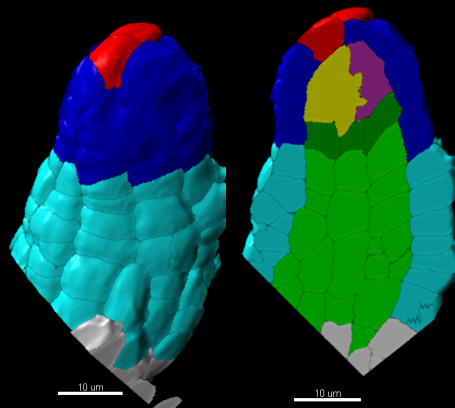

EM\_C\_159

EM\_C\_102B

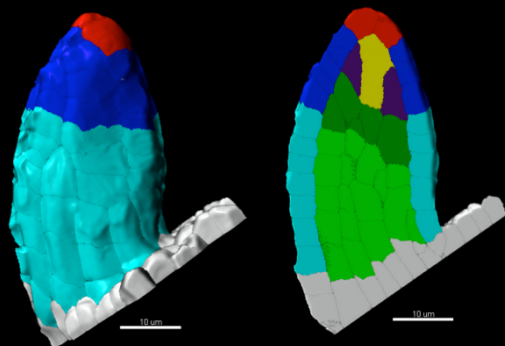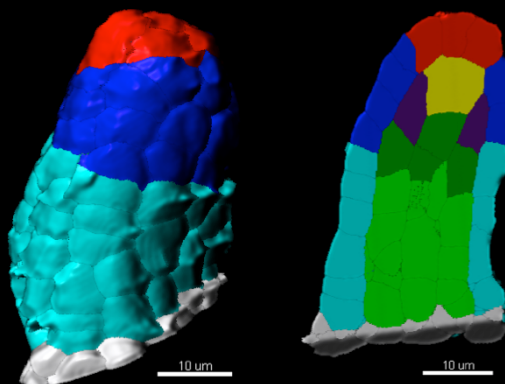

EM\_C\_113

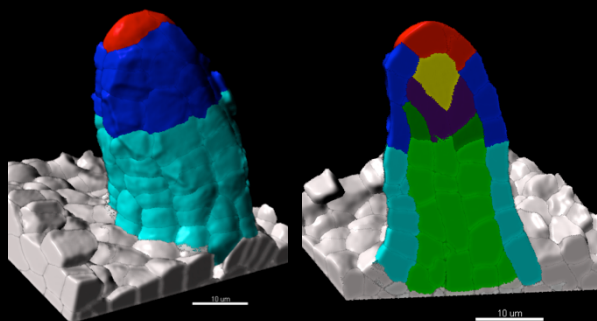

EM\_C\_161

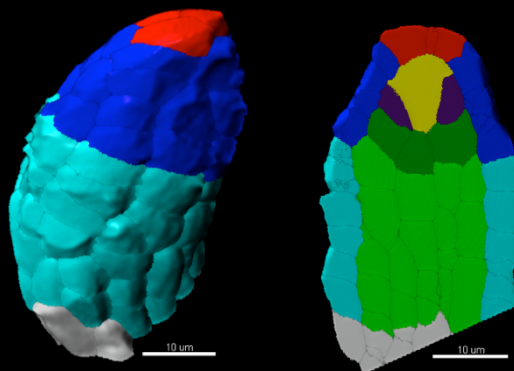

EM\_C\_157

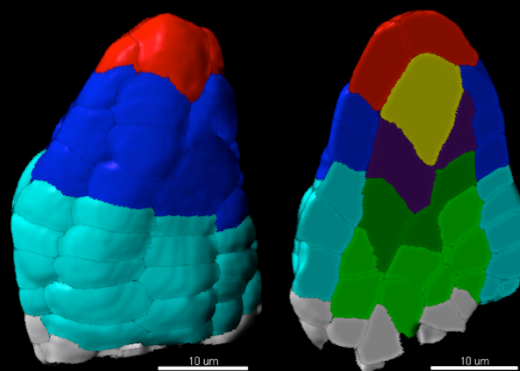

EM\_C\_191

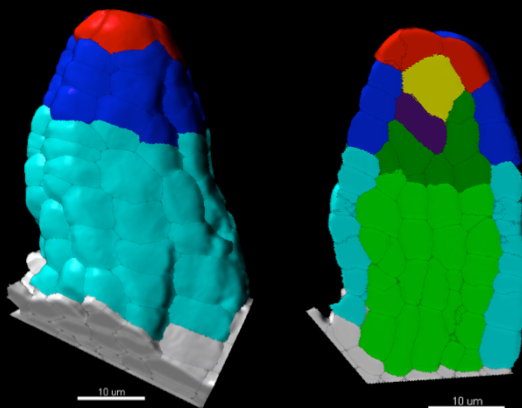

# Stage 2-I

EM\_C\_229

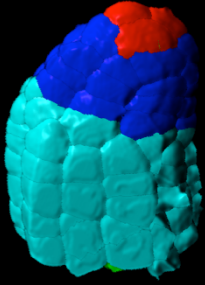

10  $\mu$ m

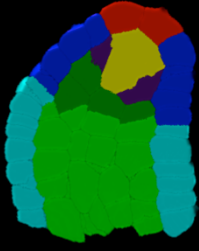

10  $\mu$ m

EM\_C\_232

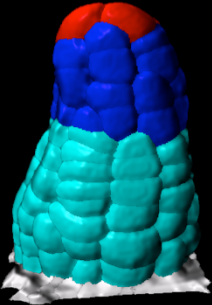

10  $\mu$ m

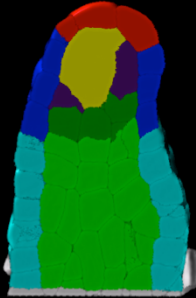

10  $\mu$ m

Stage 2-II

EM\_C\_81

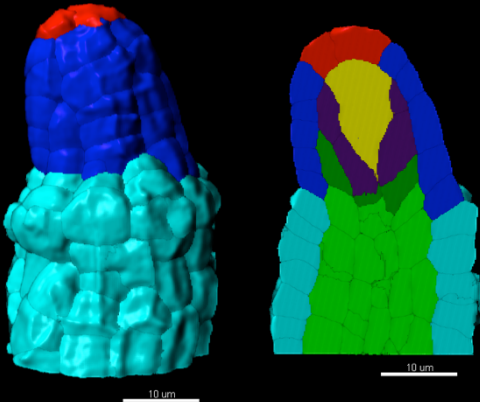

EM\_C\_230

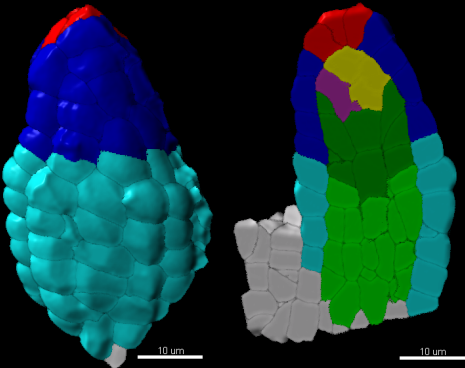

EM\_C\_128

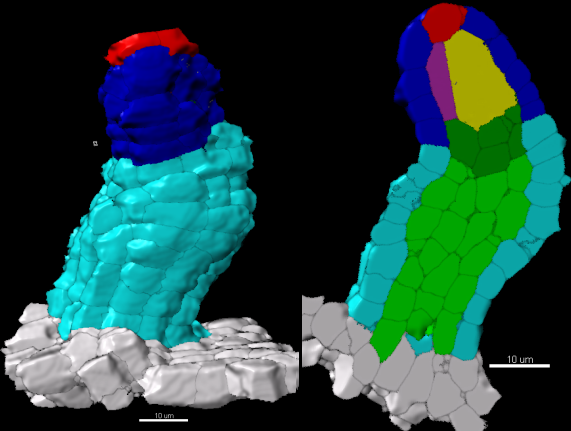

EM\_C\_254

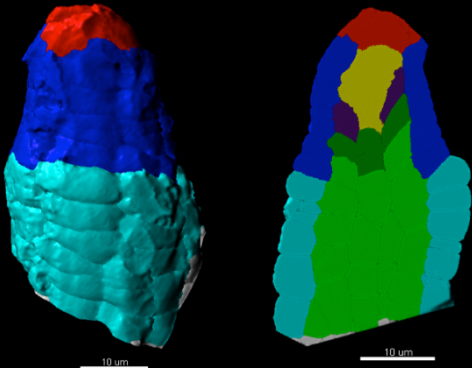

EM\_C\_129

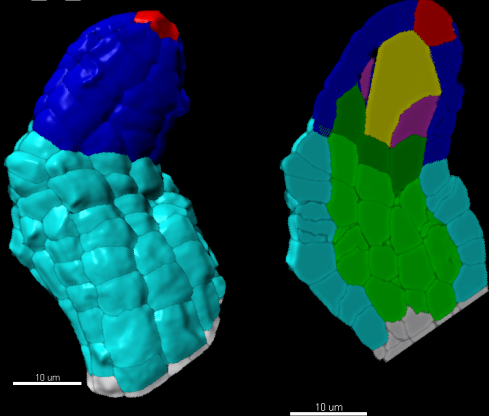

EM\_C\_352

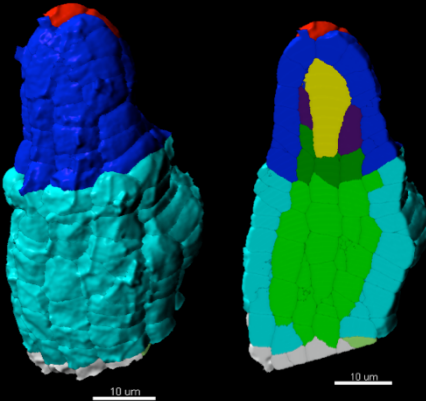

EM\_C\_132

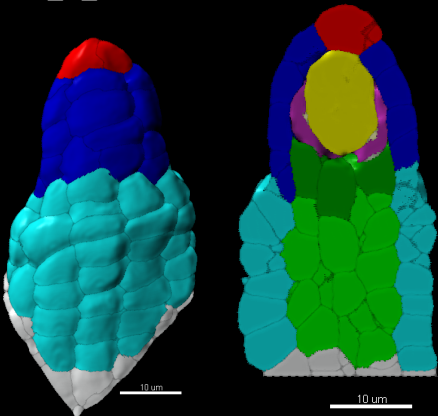

Supplement: Supplementary file [file media-3.pdf]
