# Supplementary material for: Organ geometry channels cell fate in the Arabidopsis ovule primordium
Source: bioRxiv or medRxiv preprint supplement (doi:10.1101/2020.07.30.226670), 2020-12-22

**EM\_C\_746**

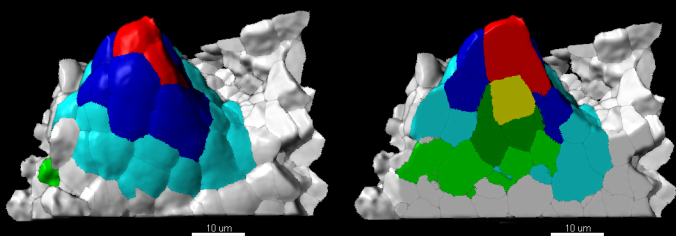

**EM\_C\_571**

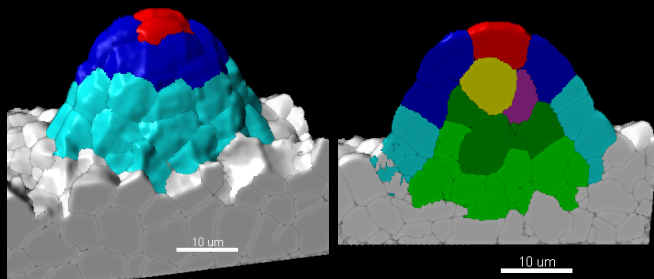

**EM\_C\_744A**

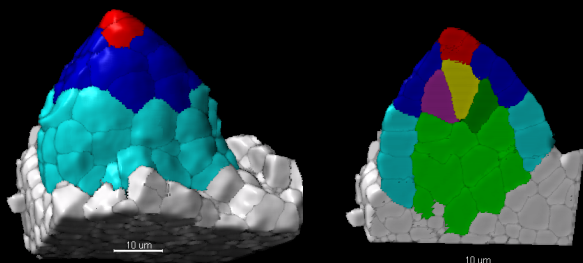

**EM\_C\_574**

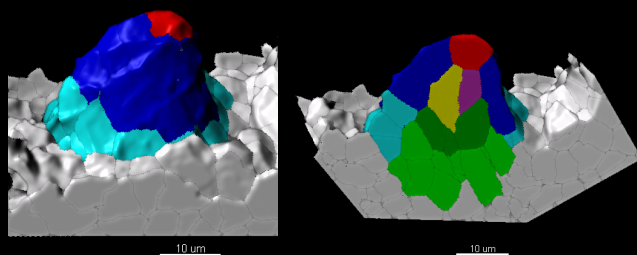

**EM\_C\_745B**

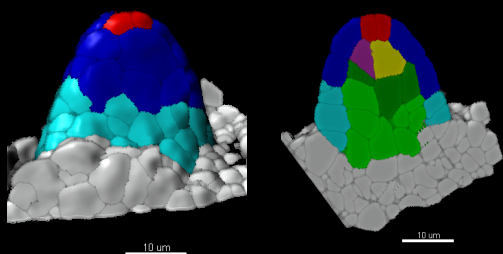

**EM\_C\_753**

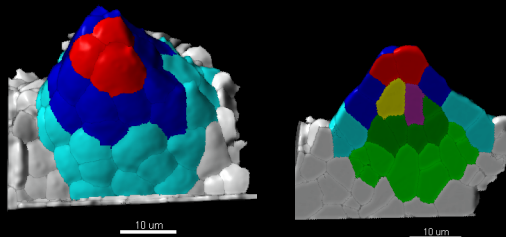

**EM\_C\_572**

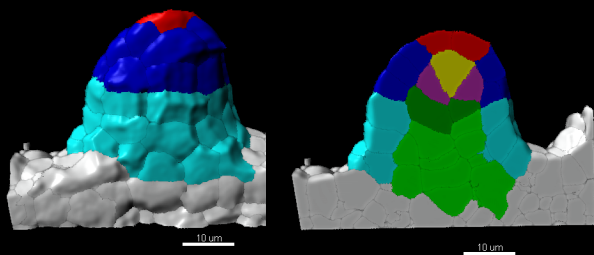

**EM\_C\_754A**

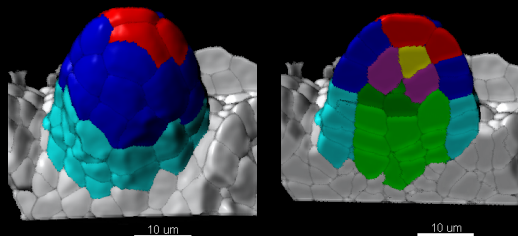

**EM\_C\_573**

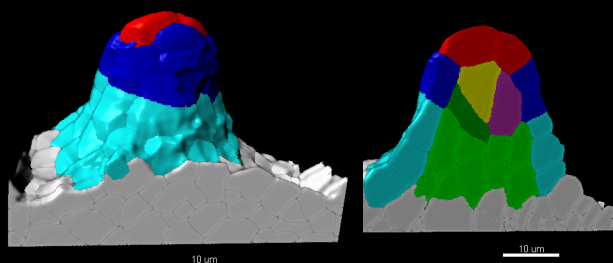

**EM\_C\_754B**

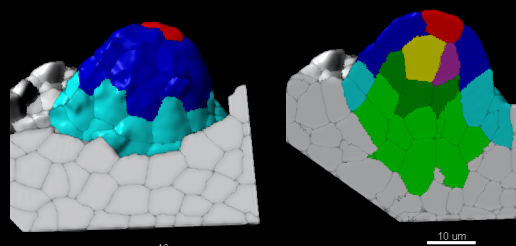

**bot1-7**

Stage 0-III

EM\_C\_280A

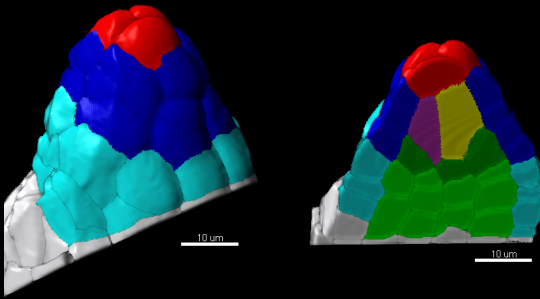

EM\_C\_755B

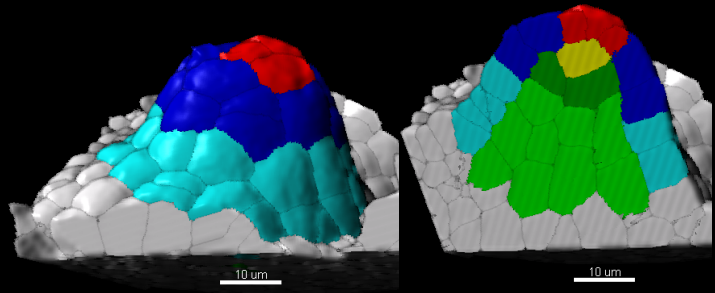

EM\_C\_792B

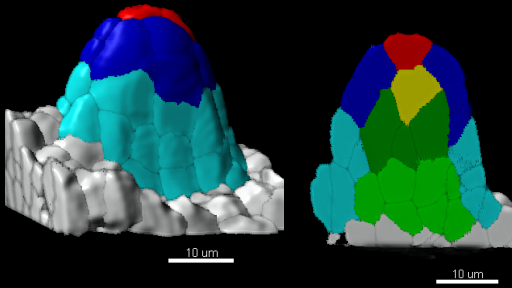

EM\_C\_790

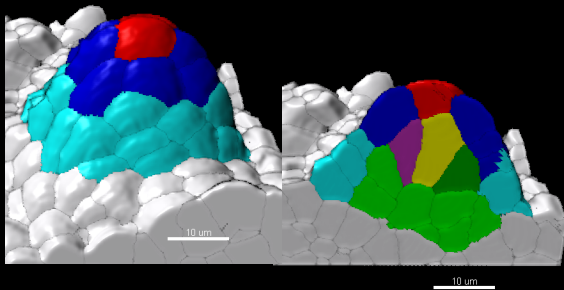

EM\_C\_777

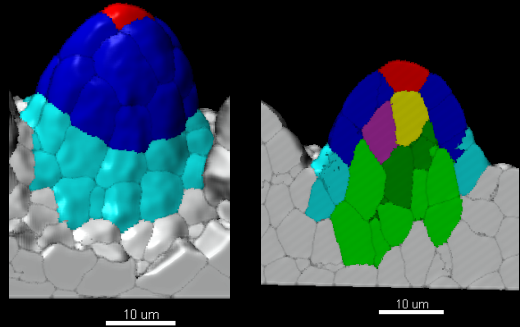

EM\_C\_779

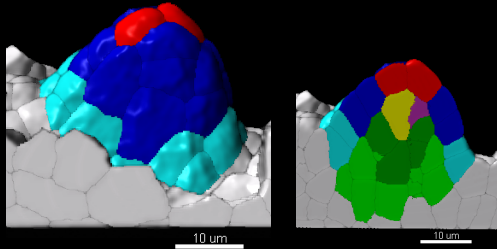

**EM\_C\_743A**

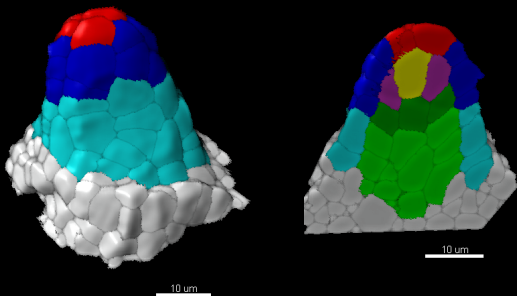

**EM\_C\_913**

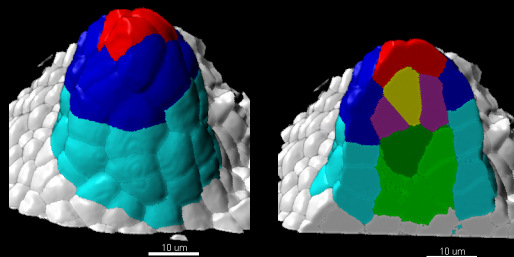

**EM\_C\_757**

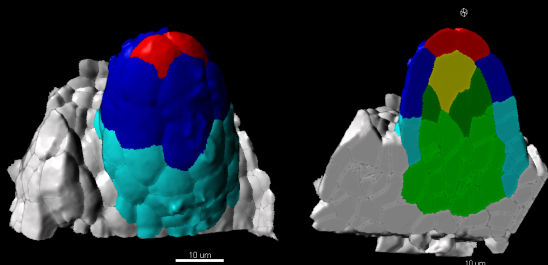

**EM\_C\_783**

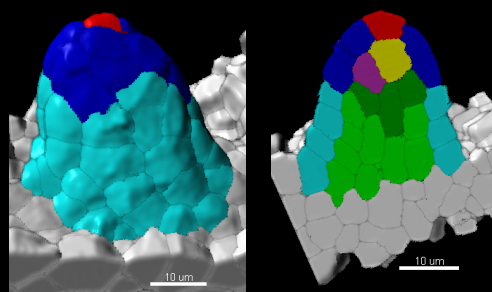

**EM\_C\_752**

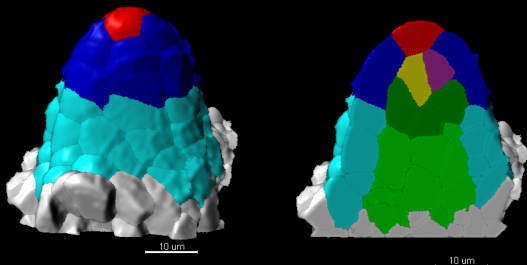

**EM\_C\_782A**

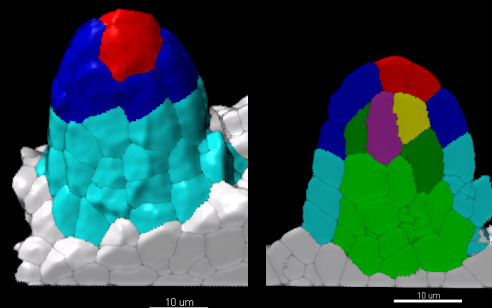

**EM\_C\_590**

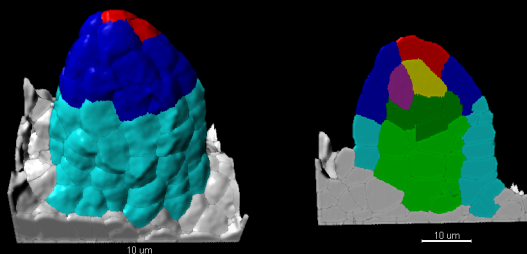

**EM\_C\_778**

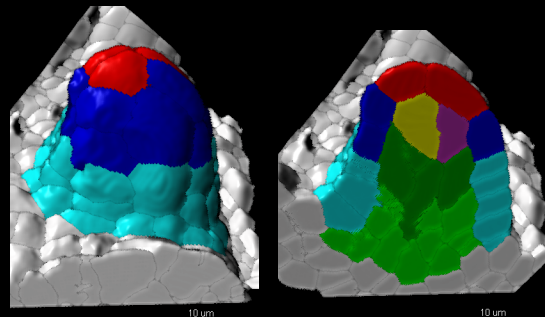

**EM\_C\_921**

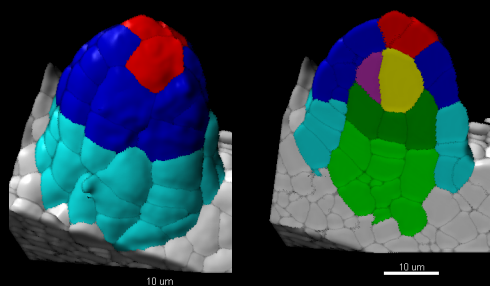

EM\_C\_914

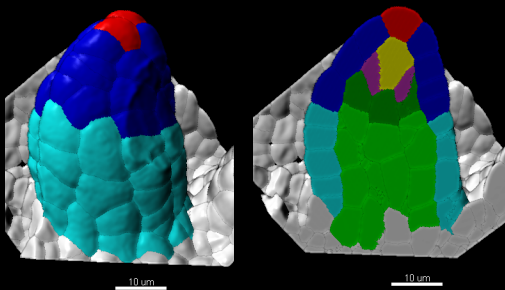

EM\_C\_747

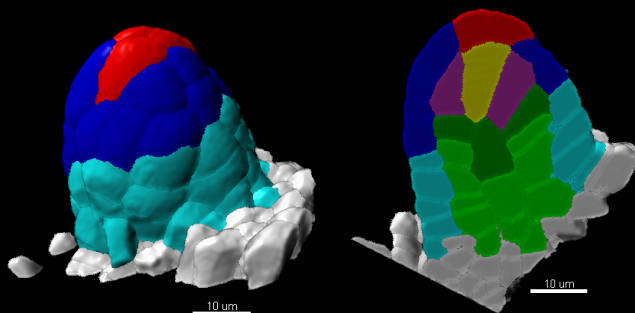

EM C 743B

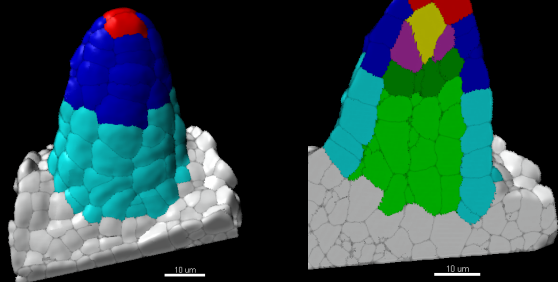

EM\_C\_750

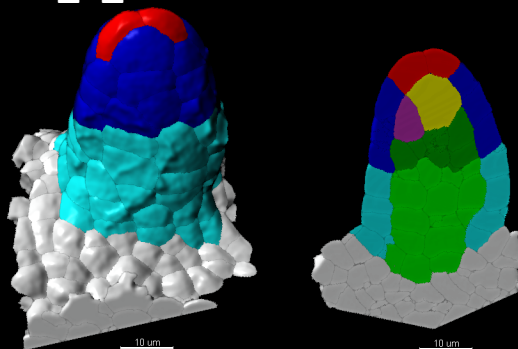

EM\_C\_744B

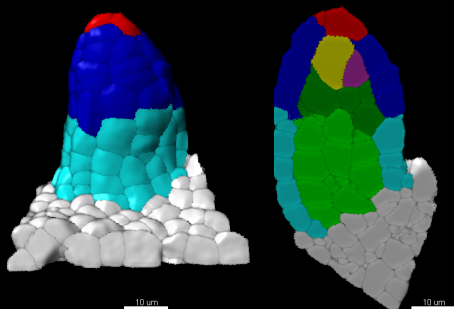

EM\_C\_751

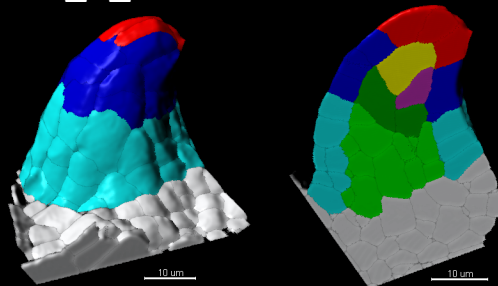

EM\_C\_745A

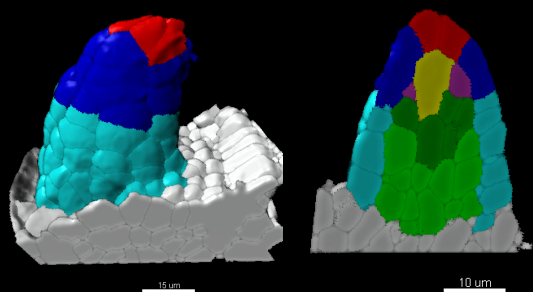

EM\_C\_591

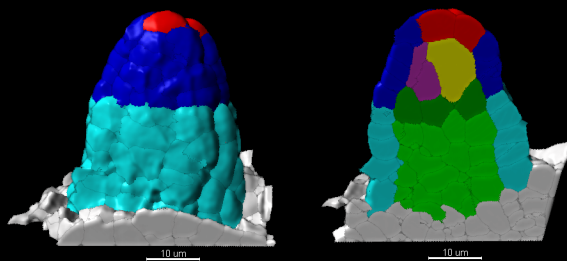



EM\_C\_755

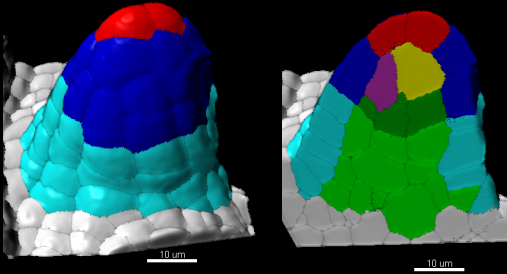

EM\_C\_768

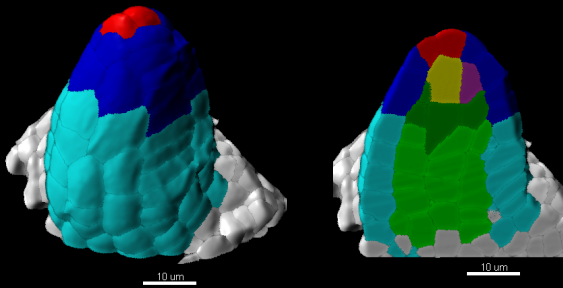

EM\_C\_281B

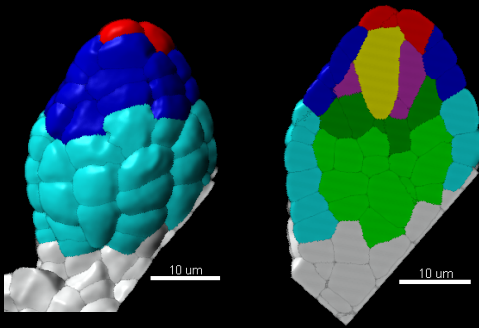

EM\_C\_282B

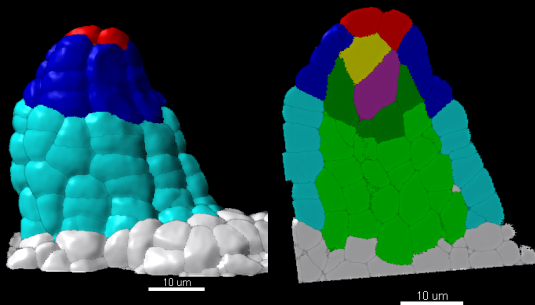

**bot1-7**

Stage 2-I

EM\_C\_748

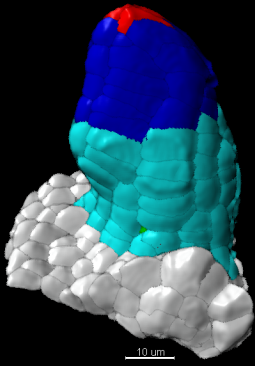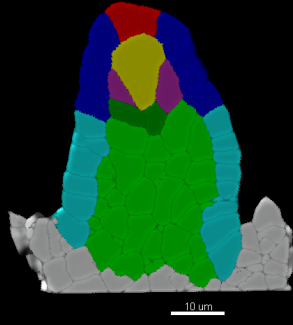

EM\_C\_592

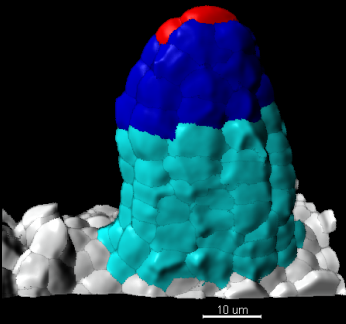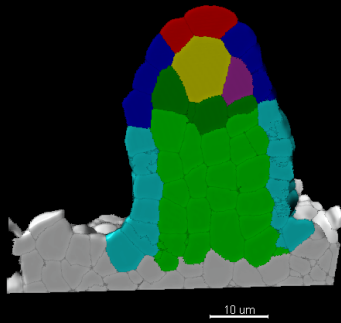

**EM\_C\_729B**

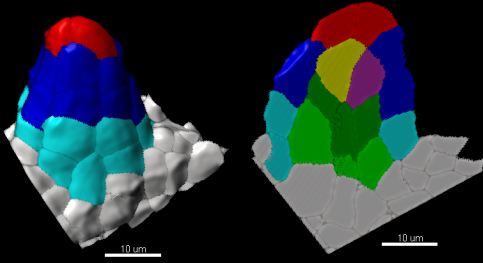

**EM\_C\_905A**

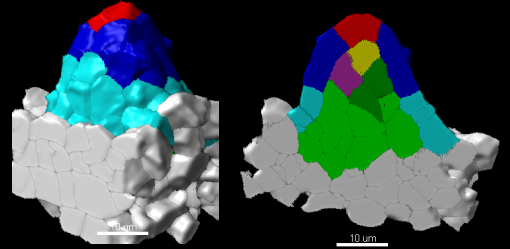

**EM\_C\_722**

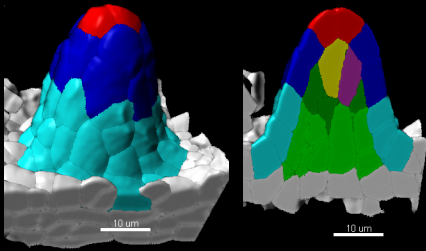

**EM\_C\_905B**

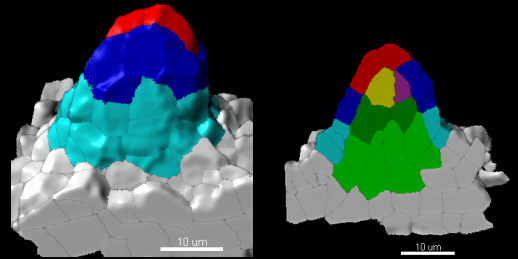

**EM\_C\_902B**

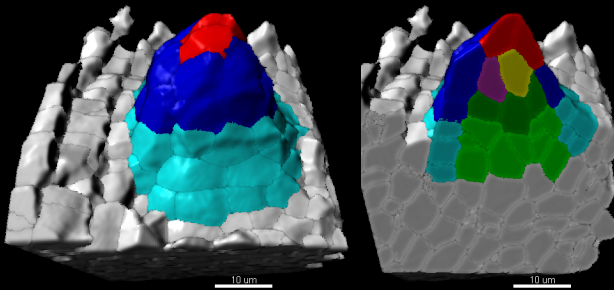

**EM\_C\_728B**

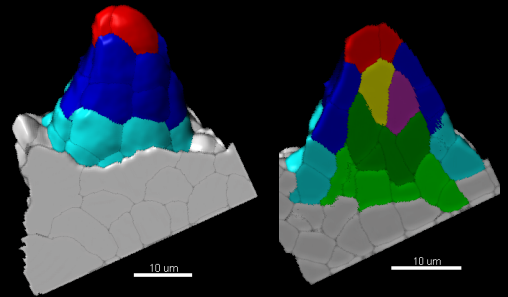

**EM\_C\_904**

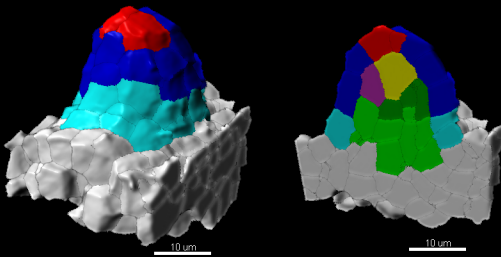

EM\_C\_732

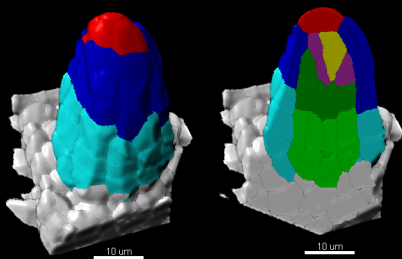

EM\_C\_726

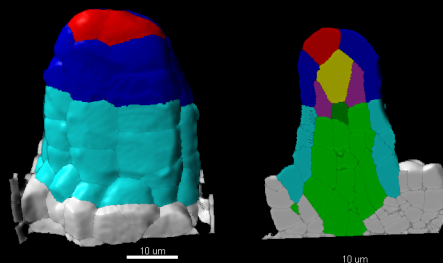

EM\_C\_735A

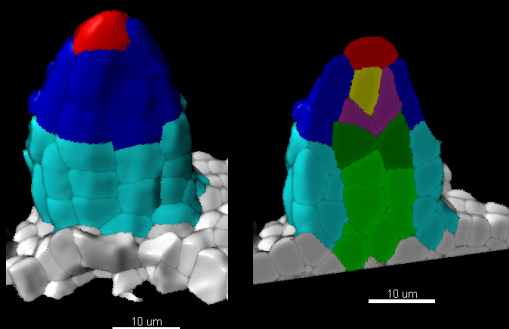

EM\_C\_731A

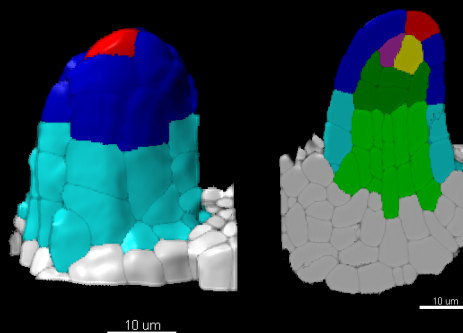

EM\_C\_723

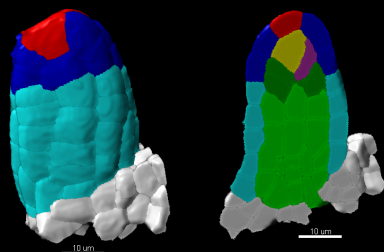

EM\_C\_731B

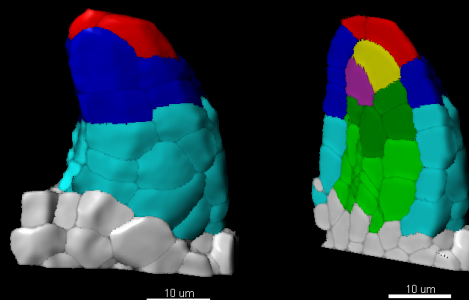

EM\_C\_724

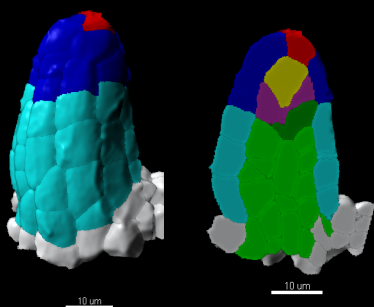

EM\_C\_733

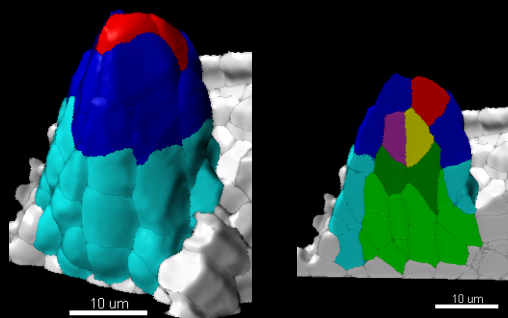



EM\_C\_729A

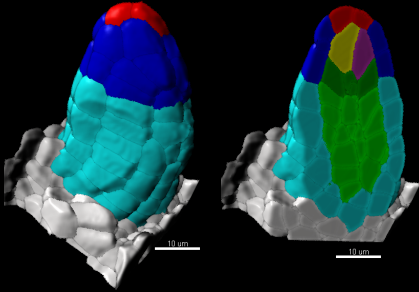

EM\_C\_736

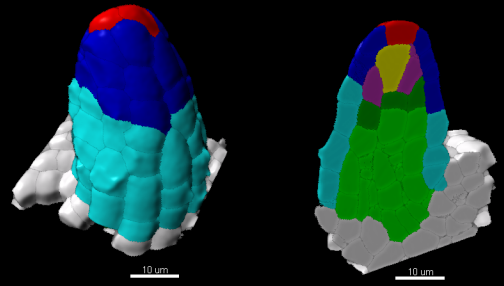

EM\_C\_719

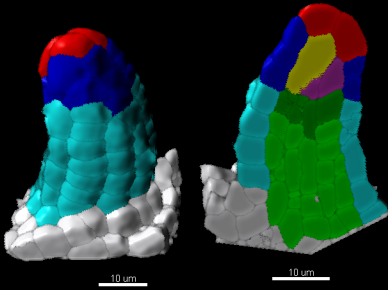

EM\_C\_727

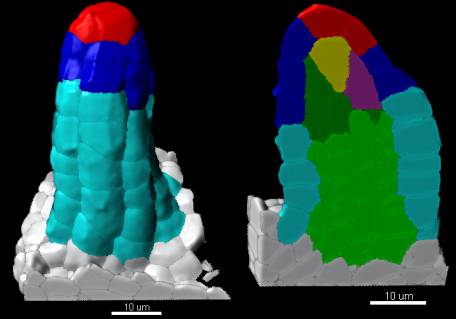

EM\_C\_734

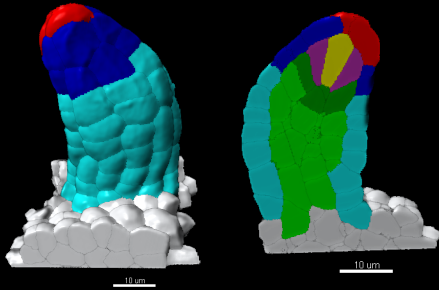

EM\_C\_677

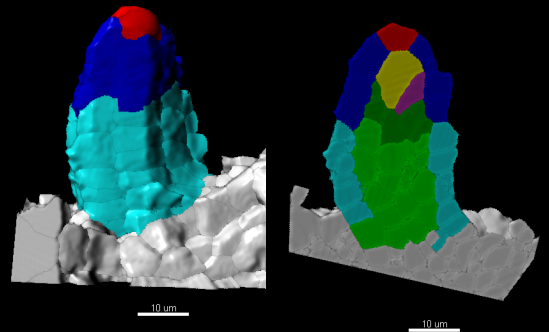

EM\_C\_735B

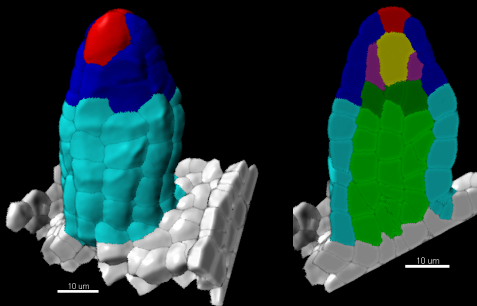

Supplement: Supplementary file [file media-5.pdf]
